# Supplementary material for: Machine Learning Combined with Radiomics Facilitating the Personal Treatment of Malignant Liver Tumors
Source: MDPI journal article supplement (doi:10.3390/biomedicines12010058), 2023-12-26
Supplement: s1 [file s1]

Supplementary Material

Table S1. Summary of published radiomics studies on the realm of treating malignant liver tumors.

| Number | Reference          | Study design<br>(retrospective/prospect<br>ive, single or<br>multicenter study) | No. of<br>patients | Type of<br>tumors | No. and type of radiomic features                                                                                                                                                      | Statistical analysis (feature<br>selection and modelling)                                                                                                       | Imaging<br>modality | Clinical Characteristics                                                      |
|--------|--------------------|---------------------------------------------------------------------------------|--------------------|-------------------|----------------------------------------------------------------------------------------------------------------------------------------------------------------------------------------|-----------------------------------------------------------------------------------------------------------------------------------------------------------------|---------------------|-------------------------------------------------------------------------------|
| 1      | Liu et al<br>[9]   | retrospective study,<br>single center                                           | 130                | HCC               | Deep learning feature                                                                                                                                                                  | Stochastic gradient descent solver,<br>Cross-entropy loss function,<br>Depthwise convolution, Global<br>pooling, Video frame sampling, and<br>Data augmentation | Ultrasound          | Predicting responses to<br>TACE                                               |
| 2      | Tian et al<br>[10] | retrospective study,<br>single center                                           | 103                | HCC               | Deep learning + 1595 (intensity,<br>geometry, gradient, texture,<br>wavelet, square, square root,<br>logarithm, exponential, Laplacian<br>of Gaussian, and local binary<br>pattern 3D) | Pearson correlation coefficie,<br>recursive feature selection, SVM-<br>Recursive Feature Elimination, and<br>linear kernel function                             | MRI                 | Assessing PD-L1 Expression<br>Level                                           |
| 3      | Wang et al<br>[11] | retrospective study,<br>multicenter                                             | 243                | HCC               | First-order, shape, texture, wavelet<br>and Laplacian of Gaussian                                                                                                                      | Spearman correlation analysis,<br>LASSO, SVM, DT, RF, XGBoost,<br>KNN, LDA, Adaboost, univariate<br>and multivariate logistic regression<br>analyses            | CT                  | Identifying the suitability of<br>TACE treatment in<br>intermediate-stage HCC |

|   |                     |                                    |     |     |                                                       |                                                                                                                  |     |                                                                        |
|---|---------------------|------------------------------------|-----|-----|-------------------------------------------------------|------------------------------------------------------------------------------------------------------------------|-----|------------------------------------------------------------------------|
| 4 | Fontaine et al [12] | retrospective study, multicenter   | 81  | HCC | 39 (shape, First-order, Gradient-based, Second-order) | Unsupervised clustering (k-means, hierarchical clustering and Affinity Propagation), Supervised clustering(mRMR) | MRI | Predicting overall survival after radiotherapy for HCC                 |
| 5 | Defeudis et al [13] | retrospective study, single center | 92  | CLM | 75 (intensity, histogram, and texture)                | Genetic algorithm, Gaussian Naive Bayes classifier, Multilayer Perceptron, and SVM                               | CT  | Predict response to first line chemotherapy in CLM                     |
| 6 | Stüber et al [14]   | retrospective study, single center | 491 | CLM | 1218 radiomics features                               | principal component analysis, a regression model with elastic net regularization, RSF, and XGBoost               | CT  | Predicting overall survival of CLM patients with radioembolization     |
| 7 | Shi et al [15]      | retrospective study, single center | 164 | HCC | 851 radiomics features                                | LASSO, Logistic regression, SVM, multilayer perceptron, and RF                                                   | CT  | Predicting the response to first TACE in intermediate-stage HCC        |
| 8 | Granata et al [16]  | retrospective study, multicenter   | 81  | CLM | Deep learning + 851 (first-order, shape, and texture) | univariate and multivariate, SVM, KNN, neural network and DT                                                     | MRI | Predicting clinical outcomes following liver resection in CLM patients |

|    |                    |                                    |     |     |                                                                                                                               |                                                                                                |    |                                                                         |
|----|--------------------|------------------------------------|-----|-----|-------------------------------------------------------------------------------------------------------------------------------|------------------------------------------------------------------------------------------------|----|-------------------------------------------------------------------------|
| 9  | Taghavi et al [17] | retrospective study, single center | 94  | CLM | 1767 (first-order, texture, Laplacian of Gaussian, wavelets, exponential, gradient, square, square-root, and logarithm)       | Kruskal–Wallis test, Pairwise correlation, and RF                                              | CT | Predict new liver metastasis after successful thermal ablation of CLM   |
| 10 | Taghavi et al [18] | retrospective study, single center | 90  | CLM | 105 (first-order, shape, and texture)                                                                                         | Inter-correlated features with pairwise correlation and Cox’s proportional hazards model       | CT | Predicting local tumor progression for CLM before thermal ablation      |
| 11 | Qi et al [19]      | retrospective study, single center | 116 | CLM | Deep learning + (shape, first-order, texture, Laplacian of Gaussian, wavelet, square, square root, logarithm and exponential) | Pearson correlation analysis, mRMR, Logistic regression, SVM, RF, AdaBoost, GBDT, and XGBoost. | CT | Identifying of CLM response to first-line irinotecan-based chemotherapy |
| 12 | Wu et al [20]      | retrospective study, single center | 132 | HCC | 396 (histogram, form factor, haralick features, and texture)                                                                  | Analysis of variance, correlation analysis, LASSO, and gradient boosting DT                    | CT | Predicting early recurrence in HCC patients after partial hepatectomy   |
| 13 | Bernatz et al [21] | retrospective study, single center | 61  | HCC | 107 (shape, first-order, and texture)                                                                                         | LASSO, recursive feature elimination and recursive feature addition                            | CT | Identifying HCC patients who will respond to repetitive TACE            |

|    |                     |                                    |     |     |                                               |                                                           |    |                                                                                                     |
|----|---------------------|------------------------------------|-----|-----|-----------------------------------------------|-----------------------------------------------------------|----|-----------------------------------------------------------------------------------------------------|
| 14 | Giannini et al [22] | retrospective study, multicenter   | 242 | CLM | 107 (shape, intensity, and texture)           | Mann–Whitney U test, SVM, Logistic regression, DT, and RF | CT | Predicting the response of individual CLM to first-line Oxaliplatin-based chemotherapy              |
| 15 | Wang et al [23]     | retrospective study, multicenter   | 543 | HCC | Deep learning                                 | LASSO, Cox regression analysis                            | CT | Evaluating survival prognosis of TACE in treatment-naïve patients with intermediate-stage HCC       |
| 16 | Qu et al [24]       | retrospective study, single center | 76  | CLM | first-order, shape, texture and wavelet       | LASSO, SVM, LDA and RF                                    | CT | Predicting the efficacy of antiangiogenic therapy in CLM                                            |
| 17 | Wang et al [25]     | retrospective study, single center | 105 | HCC | 788 (shape, first-order, texture and wavelet) | LASSO                                                     | CT | Predicting the outcome of recurrence-free survival in HCC patients within three years after surgery |
| 18 | Giannini et al [26] | retrospective study, single center | 95  | CLM | 22 (first-order and texture)                  | SVM                                                       | CT | Predicting response to chemotherapy of CLM                                                          |

|    |                       |                                    |     |     |                                                     |                                                                                                   |     |                                                                                                     |
|----|-----------------------|------------------------------------|-----|-----|-----------------------------------------------------|---------------------------------------------------------------------------------------------------|-----|-----------------------------------------------------------------------------------------------------|
| 19 | Shen et al [27]       | retrospective study, single center | 114 | HCC | 1044 (histogram, texture, form factor, and texture) | RF, Logistic regression                                                                           | CT  | Detecting early recurrence of HCC after resection or ablation                                       |
| 20 | Jolissaint et al [28] | retrospective study, single center | 138 | ICC | 254 (first-order, second-order, and texture)        | mRMR, random forest.                                                                              | CT  | Predicting early liver recurrence after resection of ICC                                            |
| 21 | Bo et al [29]         | retrospective study, multicenter   | 127 | ICC | 107 (shape, first-order, and texture)               | Independent-samples t test, mRMR, logistic, RF, neural network, Bayes, SVM, LightGBM, and XGBoost | CT  | Predicting the early recurrence of ICC after curative resection                                     |
| 22 | Zhang et al [30]      | retrospective study, single center | 98  | ICC | 396 (histogram, shape, and texture)                 | Spearman rank correlation, LASSO, and Logistic regression                                         | MRI | Predicting PD-1/PD-L1 expression and outcome in ICC                                                 |
| 23 | Tabari et al [31]     | retrospective study, single center | 97  | HCC | 112 (shape, first-order, and texture)               | mRMR, RF                                                                                          | MRI | Predicting pathologic treatment response in early-stage HCC patients who underwent ablation therapy |

|    |                 |                                    |     |                               |                                                                        |                                                                                                                                       |        |                                                                                                                              |
|----|-----------------|------------------------------------|-----|-------------------------------|------------------------------------------------------------------------|---------------------------------------------------------------------------------------------------------------------------------------|--------|------------------------------------------------------------------------------------------------------------------------------|
| 24 | Zhu et al [32]  | Retrospective study, single center | 190 | HCC                           | 107 (first-order, shape, and texture)                                  | spearman correlation analysis, LASSO, SVM, Extra-Trees, RF, LightGBM and XGBoost                                                      | CT+MRI | Evaluating the functional liver reserve before hepatectomy for liver cancer                                                  |
| 25 | Jin et al [33]  | retrospective study, multicenter   | 256 | HCC                           | 1218 (shape, first-order, texture, Laplacian of Gaussian, and wavelet) | Pearson correlation coefficients, Analysis of variance and Linear discriminant analysis                                               | CT     | Predicting patients with unresectable HCC to develop extrahepatic spread or vascular invasion after initial TACE monotherapy |
| 26 | Ji et al [34]   | retrospective study, multicenter   | 470 | HCC                           | 846 (first-order, textual, and wavelet)                                | mRMR, RSF, LASSO, Cox regression algorithm, and Unsupervised hierarchical clustering                                                  | CT     | Predicting recurrence of HCC after resection                                                                                 |
| 27 | Qin et al [35]  | retrospective study, multicenter   | 274 | perihilar cholangiocar cinoma | first-order, gradient, texture and wavelet                             | Intraclass-correlation coefficient, Holm t test, Mutual information analysis, Pearson correlation coefficients, Spearman and Kendall. | CT     | Predicting early recurrence in perihilar cholangiocarcinoma after curative resection                                         |
| 28 | Chen et al [36] | retrospective study, single center | 172 | HCC                           | 110 radiomic features                                                  | Deep learning + KNN, SVM, LASSO, and mRMR                                                                                             | MRI    | Predicting response to TACE in HCC                                                                                           |

|    |                          |                                    |     |     |                                                     |                                                                                                                                                                                              |     |                                                                                        |
|----|--------------------------|------------------------------------|-----|-----|-----------------------------------------------------|----------------------------------------------------------------------------------------------------------------------------------------------------------------------------------------------|-----|----------------------------------------------------------------------------------------|
| 29 | Dong et al [37]          | retrospective study, single center | 55  | HCC | 1229 (first-order, shape, and texture)              | intraclass correlation coefficients, LASSO, SVM, naïve Bayes, recursive partitioning and regression trees, conditional inference trees, RF, KNN, neuralnet, boosting, bagging, and logistics | CT  | Identifying progressive disease in advanced HCC receiving second-line systemic therapy |
| 30 | Peng et al [38]          | retrospective study, multicenter   | 310 | HCC | Deep Learning + (texture, shape, size, and wavelet) | Recursive feature elimination, Linear, Logistic, SVM, Gradient boosting machine, RF and back propagation calculation                                                                         | CT  | Prediction of the initial treatment response to TACE in patients with HCC              |
| 31 | Shahveran ova et al [39] | retrospective study, single center | 42  | CLM | 121 (shape, first order, and texture)               | Spearman correlation analysis, LASSO and Logistic regression                                                                                                                                 | MRI | Predicting local tumor progression after microwave ablation in CLM patients            |
| 32 | Liu et al [40]           | retrospective study, single center | 243 | HCC | Deep learning feature                               | Deep auto-encoder, Time-varying deep learning-based algorithms, Cox-Proportional Hazard                                                                                                      | CT  | Predicting prognostic risk factors in HCC with TACE                                    |
| 33 | Bo et al [41]            | retrospective study, multicenter   | 109 | HCC | 224 radiomics features                              | K-means clustering                                                                                                                                                                           | CT  | Predicting response to lenvatinib monotherapy for unresectable HCC                     |

|    |                 |                                    |     |                  |                                                                        |                                                                                  |     |                                                                                                                                |
|----|-----------------|------------------------------------|-----|------------------|------------------------------------------------------------------------|----------------------------------------------------------------------------------|-----|--------------------------------------------------------------------------------------------------------------------------------|
| 34 | Kobe et al [42] | retrospective study, single center | 36  | liver metastases | Deep learning + 104 (first-order, histogram, shape, and texture)       | Intraclass-correlation coefficient                                               | CT  | Predicting treatment response to TARE of liver metastases                                                                      |
| 35 | Deng et al [43] | retrospective study, single center | 150 | HCC              | first-order, shape, texture                                            | LASSO, Univariate and multivariate Cox regression analyses                       | CT  | Predicting the overall survival of HCC patients after radical hepatectomy                                                      |
| 36 | Ren et al [44]  | retrospective study, single center | 103 | HCC              | Deep learning + (first-order, shape, and second-order)                 | Zero median, Absolute deviation, Univariate analysis, Recursive feature addition | CT  | Predicting short-term disease control and overall survival in HCC patients who received the TACE and tyrosine kinase inhibitor |
| 37 | Liu et al [45]  | retrospective study, multicenter   | 140 | HCC              | 1210 (first-order, shape, texture, Laplacian of Gaussian, and wavelet) | mRMR, LASSO                                                                      | MRI | Predicting tumor response and outcome in HCC with TACE                                                                         |
| 38 | Hu et al [46]   | retrospective study, single center | 97  | CLM              | 108 (shape, intensity, and texture)                                    | Variance inflation factor, Hazard ratios, and RSF                                | CT  | Predicting progression-free survival for CLM treated with radiotherapy                                                         |



|    |                     |                                    |     |     |                                                                        |                                                                                                              |     |                                                                                   |
|----|---------------------|------------------------------------|-----|-----|------------------------------------------------------------------------|--------------------------------------------------------------------------------------------------------------|-----|-----------------------------------------------------------------------------------|
| 39 | Giannini et al [47] | retrospective study, single center | 38  | CLM | 24 (shape, first-order, and texture)                                   | Genetic algorithms                                                                                           | CT  | Predicting behavior of individual CLM to HER2-targeted treatment                  |
| 40 | Dercle et al [48]   | retrospective study, single center | 667 | CLM | Deep learning + 1757 (first-order, shape, texture and wavelets )       | Reproducibility analysis, Redundancy analysis, Feature ranking, SVM, KNN, Naive Bayes, RF, Bagging and LASSO | CT  | Identifying CLM sensitive to therapies targeting EGFR pathway                     |
| 41 | Peng et al [49]     | retrospective study, single center | 149 | HCC | 1409 (first-order, shape, Laplacian of Gaussian, texture, and wavelet) | mRMR, RSF, SVM, Cox regression, RSF, and XGBoost                                                             | MRI | Predicting recurrence-free survival of HCC after curative ablation                |
| 42 | Xie et al [50]      | retrospective study, single center | 259 | HCC | 101 (shape, first-order, and texture)                                  | Spearman correlation test, Mann–Whitney U test, LASSO                                                        | CT  | Assessing prognosis of early-stage HCC recurrence post-radical resection          |
| 43 | Wang et al [51]     | retrospective study, single center | 276 | HCC | 107 (shape, first-order, and texture)                                  | Intraclass-correlation coefficient, Spearman correlation analysis, Unsupervised clustering analysis          | MRI | Identifying subgroups of patients with HCC with different liver function reserves |

|    |                  |                                     |    |                                              |                                                         |                                                                                                                        |    |                                                                                                              |
|----|------------------|-------------------------------------|----|----------------------------------------------|---------------------------------------------------------|------------------------------------------------------------------------------------------------------------------------|----|--------------------------------------------------------------------------------------------------------------|
| 44 | He et al<br>[52] | retrospective study,<br>multicenter | 83 | liver<br>metastases<br>from breast<br>cancer | 665 (first-order, shape, size, texture<br>and wavelets) | Intraclass-correlation coefficient,<br>Variance threshold, SelectKBest,<br>LASSO, KNN, SVM, XGBoost,<br>RF, LR, and DT | CT | Predicating the efficacy of<br>anti-HER2 therapy for<br>patients with liver metastases<br>from breast cancer |
|----|------------------|-------------------------------------|----|----------------------------------------------|---------------------------------------------------------|------------------------------------------------------------------------------------------------------------------------|----|--------------------------------------------------------------------------------------------------------------|

---

Abbreviations: HCC: Hepatocellular carcinoma; ICC: intrahepatic cholangiocarcinoma; CLM: Colorectal liver metastases; TACE: Transarterial chemoembolization; CT: Computer tomography; MRI: Magnetic resonance imaging; TARE: Transarterial radioembolization; SBRT: Stereotactic body radiation therapy; DT: Decision tree; RF: random forest; XGBoost: Extreme gradient boosting; KNN: K-nearest neighbors; LDA: Linear discriminant analysis; SVM: Support vector machine; LASSO: Least absolute shrinkage and selection operator; mRMR: Minimum redundancy maximum correlation; RSF: Random survival forest; LightGBM: Light Gradient Boosting Machine; PD-1: Programmed death-1; PD-L1: Programmed death-ligand 1.
